# Supplementary material for: Chemical synthesis of turbostratic carbon nitride, containing C–N crystallites, at atmospheric pressure
Source: Royal Society of Chemistry journal article supplement (doi:10.1039/b307086g), 2003-01-01
Supplement: b307086g.doc [file b307086g.doc]

# Electronic Supplementary Information

**Chemical Synthesis of Turbostratic Carbon Nitride, Containing C-N Crystallites, at Atmosphere Pressure**

**Yu Qiu and Lian Gao***

**Experimental details:**

The prepared *t*-CNx solid sublimate almost completely at 800 °C in N2 and NH3 atmosphere.

**Table 1.** XPS and CHN elemental analysis of turbostratic carbon nitride

| Gas | XPS analysis (at %) | | | |  | Elemental analysis (wt %) | | | |
| --- | --- | --- | --- | --- | --- | --- | --- | --- | --- |
| N | C | O | N/Csurf | N | C | H | N/Cbulk |
| N2 | 13.6 | 83.4 | 3.0 | 0.16 |  | 19.67 | 72.68 | 2.09 | 0.23 |
| NH3 | 25.6 | 70.4 | 3.0 | 0.36 |  | 22.31 | 69.21 | 2.51 | 0.28 |

Note: In N2, the surface underwent more severe nitrogen loss than the interior, thus resulted in a lower N/Csurf (0.16) ratio than overall N/Cbulk ratio (0.23). In more active NH3, the nitrogen loss was depressed (N/Cbulk = 0.28). Meanwhile, the adsorption of NH3 increased the surface N concentration (N/Csurf = 0.36) significantly. Elemental analysis also indicates that there should be trace amount of chlorine residue in the prepared samples.


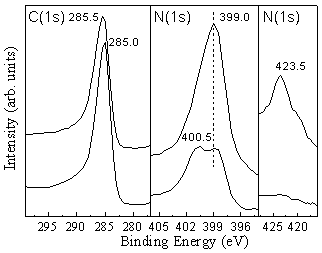


**XPS spectra:** C(1s) (left panel) and N(1s) (middle and right panel) core level photoemission spectra for N2-treated (bottom) and NH3-treated (top) sample.

**Table 2.** Comparison of the transmission electron diffraction data with the predictions in Ref. 16. The lattice constants calculated from our data are: *a* = 6.568 Å, *c* = 4.706 Å. Note: *s*, strong; *m,* medium; *w,* weak; *vw,* very weak.

| Observed | |  | α-C3N4 (predicted) | | |
| --- | --- | --- | --- | --- | --- |
| *d* (Å) | I |  | *d* (Å) | (*hkl*) | I |
| 3.62 | *s* |  | 3.60 | 101 | *s* |
|  |  |  | 3.23 | 110 | *s* |
|  |  |  | 2.80 | 200 | *m* |
| 2.43 | *s* |  | 2.41 | 201 | *s* |
|  |  |  | 2.17 | 102 | *s* |
|  |  |  | 2.12 | 210 | *s* |
| 1.96 | *s* |  | 1.90 | 112 | *s* |
|  |  |  | 1.87 | 300 | *s* |
| 1.72 | *s* |  | 1.74 | 301 | *m* |
| 1.52 | *m* |  | 1.57 | 212 | *vw* |
| 1.42 | *vw* |  | 1.48 | 311 | *vw* |
| 1.29 | *w* |  | 1.33 | 222 | *m* |
| 1.21 | *vw* |  | 1.24 | 321 | *m* |
|  |  |  | 1.18 | 004 | *w* |
| 1.08 | *vw* |  | 1.13 | 322 | *m* |
